# Supplementary material
Source: publisher site journal article supplement (https://www.dovepress.com/article/173455)
Supplement: Supplementary file 1 [file get_supplementary_file.php]

**TABLE S1** Primers used in this study

| **β-lactamases** | | | | | |
| --- | --- | --- | --- | --- | --- |
| **Gene** | **Primer** | **Sequence (5' - 3')** | **Amplified size (pb)** | **Reaction conditions** | **Reference** |
| *bla*IMP | IMPd-F | CTRCCGCAGWAGMGKCTTTG | 537 | 94ºC/5 min 94°C/1 min 56°C/1 min 72°C/1 min 72°C/10 min 30 cycles | This study |
| IMPd-R | GCCADGCTACDANATTTGCGTC |
| *bla*VIM | Vimd1- F | GATGGYGTTTGGTCGCATATC | 1 and 2:400 1 and 3: 600 | 94°C/5 min 94°C/1 min  1 and 2:54°C/1 min 1 and 3:50°C/1 min 72°C/1 min 72°C 10 min 30 cycles | This study |
| Vimd2-R | GAATGCGCAGCACCRGGA |
| Vimd3-R | CAACRTTMGYTGTGTGYTKGA |
| *blaGIM-1* | GIM-F | AGAACCTTGACCGAACGCAG | 748 | 95°C/5 min 95°C/1 min 57°C/1 min 72°C/1 min 72°C/10 min 30 cycles | 1 |
| GIM-R | ACTCATGACTCCTCACGAGG |
| *blaSPM-1* | SPM-F1 | CTAAATCGAGAGCCCTGCTTG | 800 | 94°C/5 min 94°C/1 min 56°C/1 min 68°C/1 min 68°C/5 min 30 cycles | 2 |
| SPM-R2 | CCTTTTCCGCGACCTTGATC |
| *blaNDM* | NDMv-F | AATATTATGCACCCGGTCGCG | 732 | 94°C/5 min 94°C/1 min 54°C/1 min 72°C/1 min 72°C/10 min 30 cycles | This study |
| NDMv-R | CATCACGATCATGCTGGCCTT |
| *blaGES* | GES1F | ATGCGCTTCATTCACGCAC | 864 | 94ºC/5 min 94°C/1 min 55°C/1 min 72°C/1 min 72°C/10 min 30 cycles | 3 |
| GES1R | CTATTTGTCCGTGCTCAGG |
| *bla*KPC | KPC1F | ATGTCACTGTATCGCCGTCT | 882 | 94ºC/3 min 94°C/1 min 55°C/1 min 72°C/1 min 72°C/10 min 30 cycles | 4 |
| KPC2R | TTACTGCCCGTTGACGCCCA |
| *bla*VEB-1 | VEB1F | CGACTTCCATTTCCCGATGC | 643 | 95°C/5 min 95°C/1 min 57°C/1 min 72°C/1 min 72°C/ 5 min 30 cycles | 5 |
| VEB1R | GGACTCTGCAACAAATACGC |
| *bla*PSE-1 | PSE1 | TTATTGGCATTTTCGCTTTTA | 804 | 94ºC 5 min 94°C 1 min 50°C 1 min 72°C 1 min 72°C 10 min 30 cycles | 6 |
| PSE2 | CGCATCATTTCGCTCTG |
| *bla*CMY | CMY-2F | GATTCCTTGGACTCTTCAG | 1807 | 95°C/5 min 95°C/30 s 53°C/30 s 72°C/30 s  72°C/3 min 30 cycles | 7 |
| CMY-2R | TAAAACCAGGTTCCCAGATAGC |

**TABLE S1** *(Continued)*

| **Gene** | **Primer** | **Sequence (5' - 3')** | **Amplified size (pb)** | **Reaction conditions** | **Reference** |
| --- | --- | --- | --- | --- | --- |
| *bla*PER-1 | Per1- F | AATTTGGGCTTAGGGCAGAA | 925 | 94ºC/5 min 94°C/1 min 42°C/1 min 72°C/5 min 72°C/10 min 30 cycles | 5 |
| Per1- R | ATGAATGTCATTATAAAAGC |
| *bla*OXA-2 | OXA2F | TTCAAGCCAAAGGCACGATAG | 703 | 96°C/ 5 min 96°C/1 min 61°C/1 min 72°C/2 min 72°C/10 min 35 cycles | 8 |
| OXA2R | TCCGAGTTGACTGCCGGGTTG |
| *bla*OXA-40 | OXA40-F | GGTTAGTTGGCCCCCTTAAA | 249 | 94°C/5 min 94°C/25 s 52°C/40 s 72°C/50 s 72°C/6 min 30 cycles | 9 |
| OXA40-R | AGTTGAGCGAAAAGGGGATT |
| *bla*OXA-50 | OXA50-F | GAAAGGCACCTTCGTCCTCTAC | 453 | 94°C/4 min 94°C/1 min 55°C/1 min 72°C/1 min 72°C/10 min 30 cycles | 10 |
| OXA50-R | CAGAAAGTGGGTCTGTTCCATC |
| *aac(3)-II* | aac(3)-II-F | ACTGTGATGGGATACGCGTC | 237 | 94°C/5 min 94°C/30 s 60°C/45 s 72°C/2 min 72°C/8 min 32 cycles | 11 |
| aac(3)-II-R | CTCCGTCAGCGTTTCAGCTA |
| *aac(6')-Ib* | aac(6')-Ib-F | TTGCGATGCTCTATGAGTGGCTA | 482 | 94°C/5 min 94°C/1 min 60°C/45 s 72°C/45 s 72°C/5 min 20 cycles | 12 |
| aac(6')-Ib-R | CTCGAATGCCTGGCGTGTTT |
| *qnrA* | qnrAm-F | AGAGGATTTCTCACGCCAGG | 579 | 95°C/5 min 95°C/1 min 55°C/1 min 72°C/1 min 72°C/7 min 40 cyles | 13 |
| qnrAm-R | TGCCAGGCACAGATCTTGAC |
| *qnrB* | qnrB-F | GGMATHGAAATTCGCCACTG | 263 | 94°C/5 min 94°C/45 s 53°C/45 s 72°C/1 min 72°C/5 min 32 cycles | 13 |
| qnrB-R | TTTGCYGYYCGCCAGTCGAA |
| *qnrS* | qnrS-F | GCAAGTTCATTGAACAGGGT | 427 | 95°C/5 min 95°C/1 min 55°C/1 min 72°C/1 min 72°C/7 min 35 cycles | 13 |
| qnrS-R | TCTAAACCGTCGAGTTCGGC |

**TABLE S1** *(Continued)*

| **Integrons** | | | | | |
| --- | --- | --- | --- | --- | --- |
| **Gene** | **Primer** | **Sequence (5' - 3')** | **Amplified size (pb)** | **Reaction conditions** | **Reference** |
| *intl1* | Intl1-F | ACGAGCGCAAGGTTTCGGT | 565 | 94°C/5 min 94°C/30 s 52°C/30 s 72°C/2 min 72°C/7 min 30 cycles | 14 |
| Intl1 - R | GAAAGGTCTGGTCATACATG |
| *intl2* | Intl2-F | CACGGATATGCGACAAAAAGGT | 789 | 94°C/5 min 94°C/30 s 62°C/30 s 72°C/1 min 72°C/8 min 30 cycles | 15 |
| Intl2 - R | GTAGCAAACGAGTGACGAAATG |
| Región variable 1 | rv.Intl-F | GGCATCCAAGCAGCAAG | Variable size | 94°C/5 min 94°C/1 min 55°C/1 min 65°C/8 min 72°C/8 min 35 cycles | 16 |
| rv.Intl-R | AAGCAGACTTGACCTGA |
| *qacE*Δ*1* | Qac-F | GGCTGGCTTTTTCTTGTTATCG | 247 | 94°C/5 min 94°C/30 s 60°C/30 s 72°C/1 min 72°C/8 min 30 cycles | 15 |
| Qac-R | TGAGCCCCATACCTACAAAGC |
| *sul1* | Sul1-F | TGGTGACGGTGTTCGGCATTC | 790 | 94°C/5 min 94°C/30 s 63°C/30 s 72°C/1 min 72°C/8 min 30 cycles | 15 |
| Sul1-R | GCGAGGGTTTCCGAGAAGGTG |
| *aac(6')-Ib* | aac6FRC | GCCACTCATAGAGCATCGCAA | 130 | Variable conditions | This study |
| aac6RRC | AAACACGCCAGGCATTCGAG | 41 |
| *aadA1* | aadA1FRC | TCGATACTTCGGCGATCACC | 31 | Variable conditions | This study |
| aadA1RRC | AGGCGAGATCACCAAGGTAG | 31 |
| *bla*OXA-2 | oxa2-FRC | CTAGCGTGCCTTCTTGCGCAT | 79 | Variable conditions | This study |
| oxa2-RRC | AATCGTGCGGGCAATCCTTC | 76 |
| *bla*IMP | impFRC | CAAAGNCKCTBCTGCGGYAG | 66 | Variable conditions | This study |
| impRRC | GCAAARYTGGTTGTTTCARGTCA | 120 |

**TABLE S1** *(Continued)*

| **OprD porin** | | | | | |
| --- | --- | --- | --- | --- | --- |
| **Gene** | **Primer** | **Sequence (5' - 3')** | **Amplified size (pb)** | **Reaction conditions** | **Reference** |
| *oprD* | oprD-F | TGCTGCTCCGCAACTACTATTTC | 751 | 94°C/5 min 94°C/1 min 55°C/1 min 68°C/8 min 72°C/8 min 30 cycles | 17 |
| oprD-R | GTAGGCCAAGGTGAAAGTGTG |
| *oprD* | oprDlong-F | CGCCGACAAGAAGAACTAGC | 1412 | 94°C/5 min 94°C/1 min 55°C/1 min 72°C/1 min 72°C/10 min 30 cycles | 18 |
| oprDlong-R | GTCGATTACAGGATCGACAG |
| *oprD* | oprDlong2-F | CTACGCAGATGCGACATGC | 1586 | 94°C/5 min 94°C/1 min 64°C/1 min 72°C/1 min 72°C/10 min 30 cycles | 19 |
| oprDlong2-R | CCTTTATAGGCGCGTTGCC |
| **MOB subfamily** | | | | | |
| **Gene** | **Primer** | **Sequence (5' - 3')** | **Amplified size (pb)** | **Reaction conditions** | **Reference** |
| MOBF11 | F11-f | GCAGCGTATTACTTCTCTGCTGCCGAYGAYTAYTA | 234 | 94°C/5 min 94°C/1 min 53°C/1 min 72°C/1 min 72°C/10 min 25 cycles | 20 |
| F11-r | ACTTTTGGGCGCGGARAABTGSAGRTC |
| MOBP11 | P11-f | CGTGCGAAGGGCGACAARACBTAYCA | 180 | 94°C/5 min 94°C/1 min 60°C/1 min 72°C/1 min 72°C/10 min 25 cycles | 20 |
| P1-r | CGTGCGAAGGGCGACAARACBTAYCA |
| MOBP13 | P131-f | AACCCACGCTGCAARGAYCCVGT | 180 | 94°C/5 min 94°C/1 min 59°C/1 min 72°C/15 s 72°C/10 min 30 cycles | 20 |
| P131-f | AGCGATGTGGATGTGAAGGTTRTCNGTRTC |
| MOBP14 | P14-f | CGCAGCAAGGACACCATCAAYCAYTAYRT | 174 | 94°C/5 min 94°C/1 min 50°C/1 min 72°C/1 min 72°C/10 min 25 cycles | 20 |
| P1-r | AGCGATGTGGATGTGAAGGTTRTCNGTRTC |
| MOBP4 | P4-f | GCGTTCAGGATGGTCYTBTCSATGCC | 163 | 94°C/5 min 94°C/1 min 64°C/1 min 72°C/1 min 72°C/10 min 25 cycles | 20 |
| P4-r | CGGTTTTGACCGTCAGATGSVMATGCGG |
| MOBQ11 | Q11-f | CAATCGTCCAAGGCGAARGCNGAYTA | 331 | 94°C/5 min 94°C/1 min 50°C/1 min 72°C/1 min 72°C/10 min 30 cycles | 20 |
| Q11-r | CGCTCGGAGATCATCAYYTGYCAYTG |

**TABLE S1** *(Continued)*

| **MOB subfamily** | | | | | |
| --- | --- | --- | --- | --- | --- |
| **Gene** | **Primer** | **Sequence (5' - 3')** | **Amplified size (pb)** | **Reaction conditions** | **Reference** |
| MOBH11 | H11-f | CCGGCGTCGGAGAAYCAYCAYCA | 207 | PCR touchdown: iniciar a 65°C  ΔTa= -1°C por ciclo, 15 ciclos a 55°C | 20 |
| H11-r | AAGGTCGTATACCTTYCCKGCRTCRTG |
| MOBH121 | H121-f | GCCAGCTTCCGAATCACAYCAYCAYCG | 313 | 94°C/5 min 94°C/1 min 59°C/1 min 72°C/1 min 72°C/10 min 30 cycles | 20 |
| H121-r | GTCGCTTGTCGCGCCACCGDATRAARTA |
| MOBH2 | H2-f | AGTTCCCAGCCTCAGAAATCCAYCAYCAYKC | 264 | 94°C/5 min 94°C/1 min 68°C/1 min 72°C/1 min 72°C/10 min 30 cycles | 20 |
| H2-r | GCGGACCGTGCCANGGRTGCCA |
| **Inc Group** | | | | | |
| **Gene** | **Primer** | **Sequence (5' - 3')** | **Amplified size (pb)** | **Reaction conditions** | **Reference** |
| IncP | P FW | CTATGGCCCTGCAAACGCGCCAGAAA | 534 | 94°C/5 min 94°C/1 min 60°C/30 s 72°C/1 min 72°C/5 min  30 cycles | 21 |
| P RW | TCACGCGCCAGGGCGCAGCC |

Supplementary Table 1 continued

# References

1. Castanheira M, Toleman MA, Jones RN, et al. Molecular characterization of a β -lactamase gene, *bla*GIM-1, encoding a new subclass of metallo- β -lactamase. *Antimicrob Agents Chemother*. 2004;48(12):4654–4661.
2. Mendes RE, Kiyota KA, Monteiro J, et al. Rapid detection and identification of metallo-β-lactamase-encoding genes by multiplex real-time PCR assay and melt curve analysis. *J Clin Microbiol*. 2007;45(2):544–547.
3. Poirel L, Le Thomas I, Naas T, et al. Biochemical sequence analyses of GES-1, a novel class A extended-spectrum β-lactamase, and the class 1 integron In*52* from *Klebsiella pneumoniae*. *Antimicrob Agents Chemother*. 2000;44(3):622–632.
4. Akpaka PE, Swanston WH, Ihereme HN, et al. Emergence of KPC-producing *Pseudomonas aeruginosa* in Trinidad and Tobago. *J. Clin microbiol*. 2009;47(8):2670–2671.
5. Jiang X., Min Z, Zhou D, et al. Detection of extended-spectrum β-lactamases in clinical isolates of *Pseudomonas aeruginosa*. *Antimicrob Agents Chemother*. 2006;50(9):2990–2995.
6. Pai Hyunjoo, Kim JW, Kim J, et al. Carbapenem resistance mechanisms in *Pseudomonas aeruginosa* clinical isolates. *Antimicrob Agents Chemother*. 2001;45(2):480–484.
7. Stapleton PD, Shannon KP, French GL. Carbapenem resistance in *Escherichia coli* associated with plasmid-determined CMY-4 β-lactamase production and loss of an outer membrane protein. *Antimicrob Agents Chemother*. 1999;43(5):1206–1210.
8. Steward CD, Rasheed JK, Hubert SK, et al. Characterization of clinical isolates of *Klebsiella pneumoniae* from 19 laboratories using the National Committee for Clinical Laboratory Standards extended-spectrum β-lactamase detection methods. *J. Clin. Microbiol*. 2001;39(8):2864–2872.
9. Woodford N, Ellington MJ, Coelho JM, et al. Multiplex PCR for genes encoding prevalent OXA carbapenemases in *Acinetobacter* spp. *Int J Antimicrob Agents*. 2006;27(4):351–353.
10. Crãciunaş C, Butiuc-keul A, Flonta M, et al. Application of molecular techniques to the study of *Pseudomonas aeruginosa* clinical isolate in Cluj-Napoca, Romania. Analele Universităţii din Oradea-Fascicula Biologie. 2012;Tom XVII(2):243–247.
11. Van de Klundert JAM,. Vliegenthart JS. PCR detection of genes coding for aminoglycoside-modifying enzymes. 1993;547–552. In Persing DH, Smith TF, Tenover FC, et al. White (ed.), *Diagnostic Molecular Microbiology*. American Society for Microbiology, Washington, D.C.
12. Park CH, Robicsek A, Jacoby GA, et al. Prevalence in the United States of *aac(6´)-Ib-cr* encoding a ciprofloxacin-modifying enzyme. *Antimicrob Agents Chemother*. 2006;50(11):3953–3955.
13. Cattoir V, Poirel L, Rotimi V, et al. Multiplex PCR for detection of plasmid-mediated quinolone resistance *qnr* genes in ESBL-producing enterobacterial isolates. *J Antimicrob Chemother*. 2007; 60(2): 394–397.
14. Su J, Shi L, Yang L, et al. Analysis of integrons in clinical isolates of *Escherichia coli* in China during the last six years. *FEMS Microbiol Lett*. 2006;254(1):75–89.
15. Mazel D, Dychinco B, Webb VA, et al. Antibiotic resistance in the ECOR collection: integrons and identification of a novel *aad* gene. *Antimicrob Agents Chemother*. 2000;44(6):1568–1574.
16. Lèvesque C, Piché L, Larose Ch, et al. PCR mapping of integrons reveals several novel combinations of resistance genes. *Antimicrob Agents Chemother*. 1995;39(1):185–191.
17. Naenna O, Noisumdaeng P, Pongpech P, etal. Detection of outer membrane porin protein, an imipenem influx cannel, in *Pseudomonas aeruginosa* clinical isolates. [*Southeast Asian J Trop Med Public Health*.](https://www.ncbi.nlm.nih.gov/pubmed/20578550) 2010;41(3):614–624.
18. Gutiérrez O, Juan C, Cercenado E, et al. Molecular epidemiology and mechanisms of carbapenem resistance in *Pseudomonas aeruginosa* isolates from Spanish hospitals. *Antimicrob Agents Chemother*. 2007;51(12):4329–4335.
19. Wolter DJ, Hanson ND, Lister PD. Insertional inactivation of *opr*D in clinical isolates of *Pseudomonas aeruginosa* leading to carbapenem resistance. *FEMS Microbiol Lett.* 2004;236(1):137–143.
20. Alvarado A, Garcillán-Barcia MP, de la Cruz F. A degenerate primer MOB typing (DPMT) method to classify gamma-proteobacterial plasmids in clinical and environmental settings. *PLoS ONE*. 2012;7(7):1–15.
21. Carattoli A, Bertini A, Villa L, et al. Identification of plasmids by PCR-based replicon typing. *J Microbiol Methods*. 2005;63(3):219–228.
